# Supplementary material for: Dual-Responsive Molecular Probe for Tumor Targeted Imaging and Photodynamic Therapy
Source: PubMed Central journal article supplement — Theranostics. 2017 Apr 10;7(7):1781–94. doi: 10.7150/thno.18437 (PMC5479268; doi:10.7150/thno.18437), 2017-04-10
Supplement: thnov07p1781s1.pdf [file thnov07p1781s1.pdf]

## **Dual-Responsive Molecular Probe for Tumor Targeted Imaging and Photodynamic Therapy**

Xiaoqing Meng<sup>1,2,#</sup>, Yueting Yang<sup>1,#</sup>, Lihua Zhou<sup>1,3</sup>, li Zhang<sup>1</sup>, Yalin Lv<sup>1</sup>, Sanpeng Li<sup>1,2</sup>, Yayun Wu<sup>1</sup>, Mingbin Zheng<sup>1,4,5</sup>, Wenjun Li<sup>1</sup>, Guanhui Gao<sup>1</sup>, Guanjun Deng<sup>1,2</sup>, Tao Jiang<sup>1</sup>, Dapeng Ni<sup>1,2</sup>, Ping Gong<sup>1,4,5\*</sup> and Lintao Cai<sup>1,\*</sup>

1. Guangdong Key Laboratory of Nanomedicine, CAS Key Lab of Health Informatics, Shenzhen Institutes of Advanced Technology, Chinese Academy of Sciences, Shenzhen 518055, China.
2. University of Chinese Academy of Sciences, Beijing 100049, China.
3. College of Life Sciences, Hunan Normal University, Changsha 410081, China.
4. Guangdong Key Laboratory for Research and Development of Natural Drugs, Guangdong Medical University, Dongguan 523808, China.
5. State Key Laboratory of Chemo/Biosensing and Chemometrics, Hunan University, Changsha 410082, China.

# Equal contribution

\*Correspondence author: Ping Gong, E-mail: ping.gong@siat.ac.cn; Tel: +86 755 8639 2223.

Lintao Cai, E-mail: lt.cai@siat.ac.cn; Tel: +86 755 8639 2210.

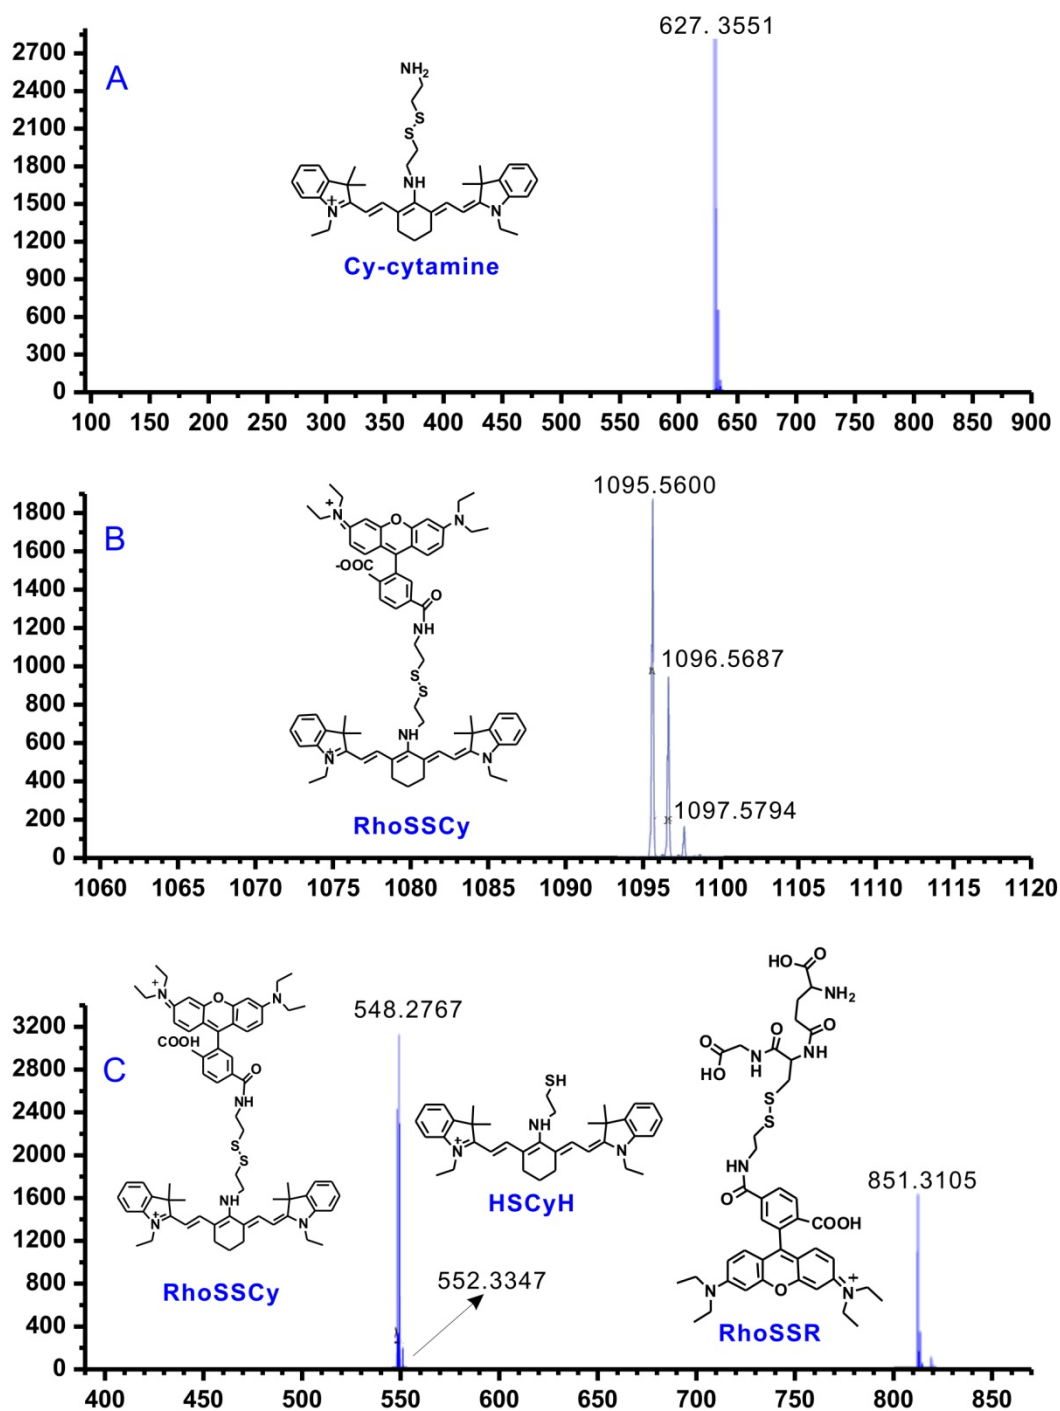

**Figure S1.** Mass spectrum of compounds. (A) Cy-cytamine. HRMS (EI)  $m/z$   $C_{38}H_{51}N_4S_2^+$  ( $M^+$ ): 577.2666. Found 577.2654. (B) RhoSSCy. HRMS (EI)  $m/z$   $C_{67}H_{79}N_6O_4S_2^+$  ( $M^+$ ): 1095.5604. Found 1095.5600. (C) The mass spectra of RhoSSCy and the new molecules RhoSSR and HSCy. RhoSSCy HRMS (EI)  $m/z$   $C_{67}H_{80}N_6O_4S_2^{2+}$  ( $M^{2+}$ ): 548.2850. Found 548.2767. RhoSSR HRMS (EI)  $m/z$   $C_{41}H_{51}N_6O_{10}S_2^+$  ( $M^+$ ): 851.3103. Found 851.3105. HSCy HRMS (EI)  $m/z$   $C_{36}H_{46}N_3S^+$  ( $M^+$ ): 552.3407. Found 552.3347.

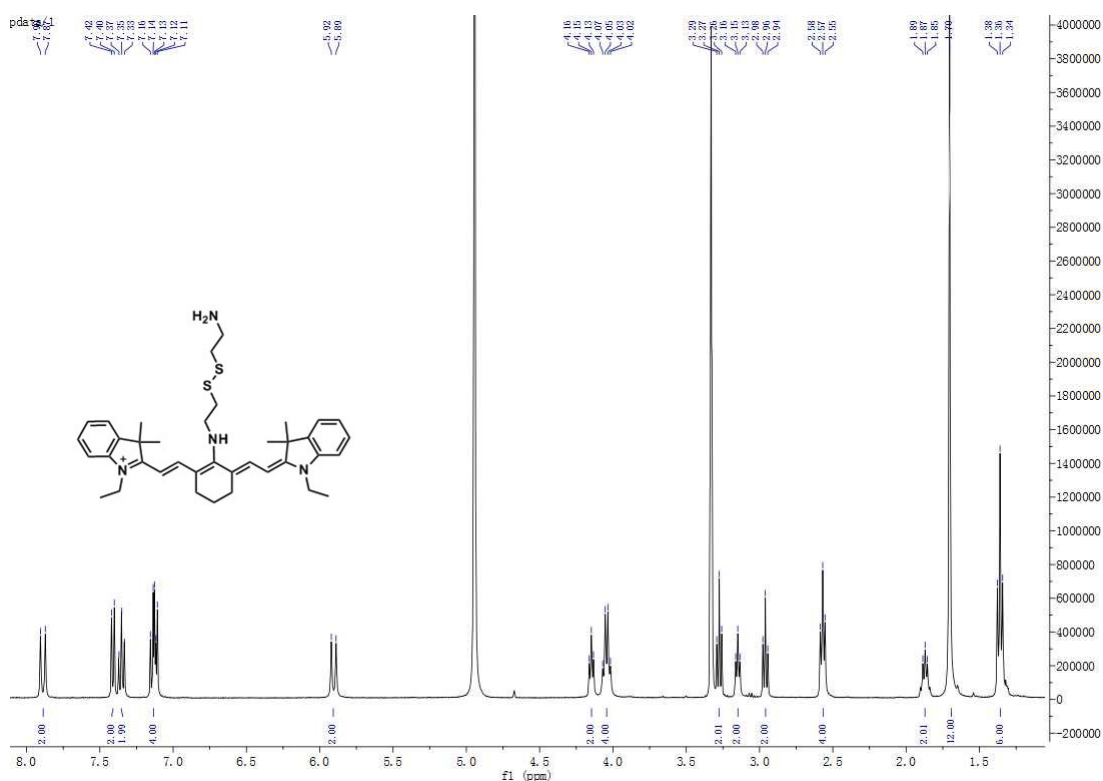

**Figure S2.** Cyss was confirmed by  $^1\text{H}$  NMR. (400 MHz,  $\text{CD}_3\text{OD}$ ),  $\delta$  7.90 (d,  $J=12.98$  Hz, 2H),  $\delta$  7.41 (d,  $J=5.50$  Hz, 2H),  $\delta$  7.35 (t,  $J=14.35$  Hz, 2H),  $\delta$  7.15 (d,  $J=9.16$  Hz, 2H),  $\delta$  7.12 (t,  $J=14.12$  Hz, 2H),  $\delta$  5.91 (d,  $J=12.59$  Hz, 2H),  $\delta$  4.15 (t,  $J=10.15$  Hz, 2H),  $\delta$  4.03 (q,  $J=10.46$  Hz, 4H),  $\delta$  3.27 (t,  $J=10.69$  Hz, 2H),  $\delta$  3.15 (t,  $J=11.85$  Hz, 2H),  $\delta$  2.96 (t,  $J=10.81$  Hz, 2H),  $\delta$  2.57 (t,  $J=10.81$  Hz, 4H),  $\delta$  1.87 (t,  $J=10.46$  Hz, 2H),  $\delta$  1.70 (s, 12H),  $\delta$  1.36 (t,  $J=7.05$  Hz, 6H)

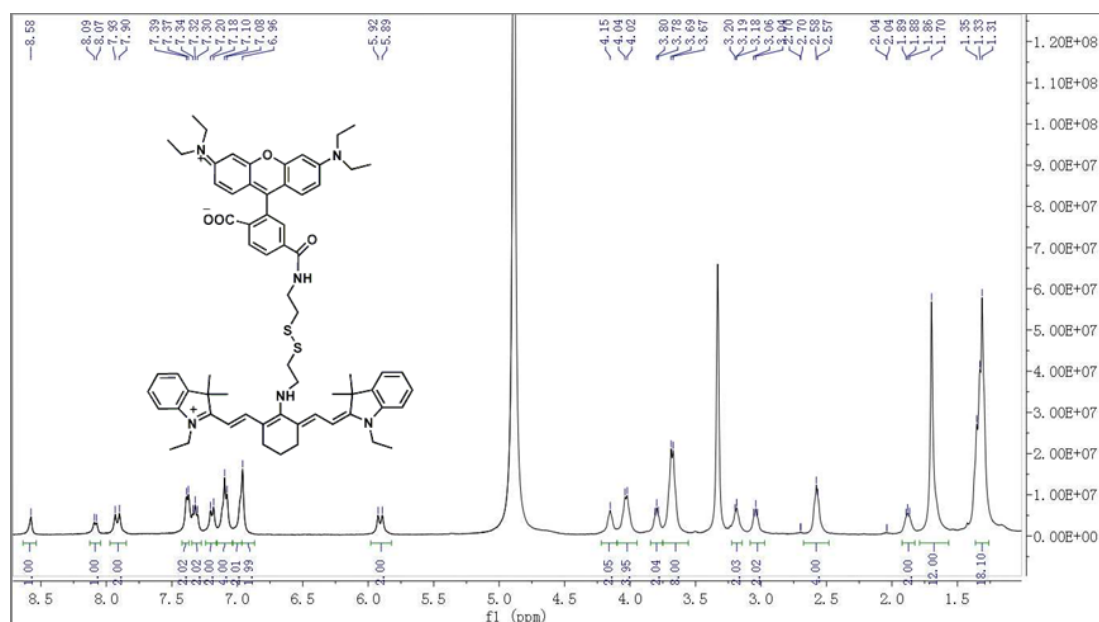

**Figure S3.** RhoSSCy was confirmed by  $^1\text{H}$  NMR. (400 MHz,  $\text{CD}_3\text{OD}$ ),  $\delta$  8.58 (s, 1H),  $\delta$  8.08 (d,  $J=6.87$  Hz, 1H),  $\delta$  7.92 (d,  $J=12.98$  Hz, 2H),  $\delta$  7.38 (d,  $J=5.50$  Hz, 2H),  $\delta$

7.32 (t, J=14.35 Hz,2H),  $\delta$  7.19 (d, J=9.16 Hz,2H), $\delta$  7.10 (t, J =14.12 Hz, 4H),  $\delta$  6.98 (s, 2H),  $\delta$  6.96 (s, 2H),  $\delta$  5.91 (d, J = 12.59 Hz, 2H),  $\delta$  4.15 (t, J = 10.15 Hz, 2H),  $\delta$  4.03 (q, J = 10.46 Hz, 4H),  $\delta$  3.80 (t, J = 11.04Hz, 2H),  $\delta$  3.68 (d, J = 6.47 Hz, 8H),  $\delta$  3.19 (t, J = 10.69 Hz,2H),  $\delta$  3.04 (t, J = 11.85 Hz, 2H),  $\delta$  2.58 (t, J = 10.81 Hz, 4H),  $\delta$  1.88 (t, J = 10.46 Hz, 2H),  $\delta$  1.70 (s, 12H),  $\delta$  1.33 (t, J = 7.05 Hz, 18H)

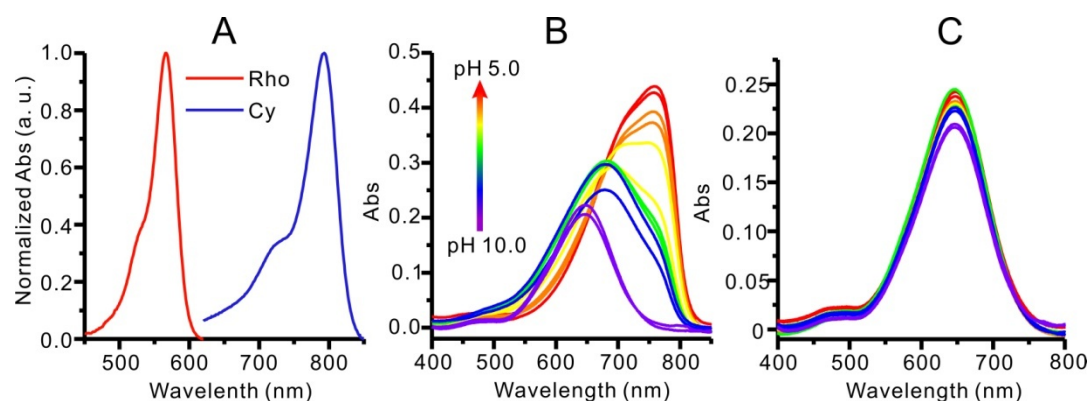

**Figure S4.** (A) UV-Vis absorption spectra of Rho and Cy. (B) UV-Vis absorption spectra of RhoSSCy at different pH (5.0, 5.5, 6.0, 6.5, 7.0, 7.5, 8.0, 8.5, 9.0, 9.5 and 10.0). (C) UV-Vis absorption spectra of RhoSSCy with different concentration of GSH (0, 1, 2, 3, 4, 5, 6, 7, 8, 9, 10, 15, 20 and 50  $\mu$ M).

**Table 1.** The fluorescence quantum yield of Rho group and a Cy group under different conditions

| condition            | structure         | fluorescence quantum yield |
|----------------------|-------------------|----------------------------|
| Without GSH, PH 10.0 | Rho group         | 0.01                       |
|                      | Cy group          | 0.007                      |
| Without GSH, PH 5.0  | Rho group         | 0.01                       |
|                      | Cy group          | 0.14                       |
| With GSH, PH 10.0    | RhoSSR            | 0.34                       |
|                      | HCyH              | 0.007                      |
| With GSH, PH 5.0     | RhoSSR            | 0.34                       |
|                      | HCyH <sup>+</sup> | 0.14                       |

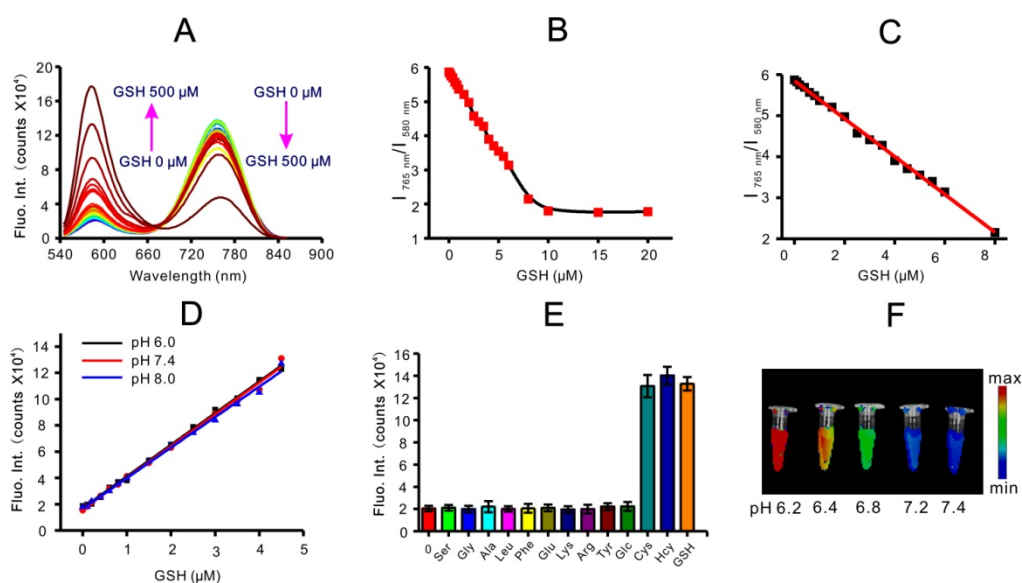

**Figure S5.** Fluorescence responses of RhoSSCy toward biothiols and pH. (A) Fluorescence spectra of 10  $\mu$ M RhoSSCy with different concentration of GSH upon excitation at 480 nm in 20 mM PBS (containing 1% DMF). (B) Fluorescence-based GSH titration curve ( $\lambda_{\text{ex}}$  at 480 nm). (C) The linear calibration plot of GSH titration. (D) Fluorescence intensity-based GSH titration curves with three different pH values ( $\lambda_{\text{ex}}$  at 480 nm and  $\lambda_{\text{em}}$  at 576 nm). (E) Fluorescence responses of RhoSSCy toward other analytes. (F) Fluorescence images of RhoSSCy in PBS buffer at different pH.

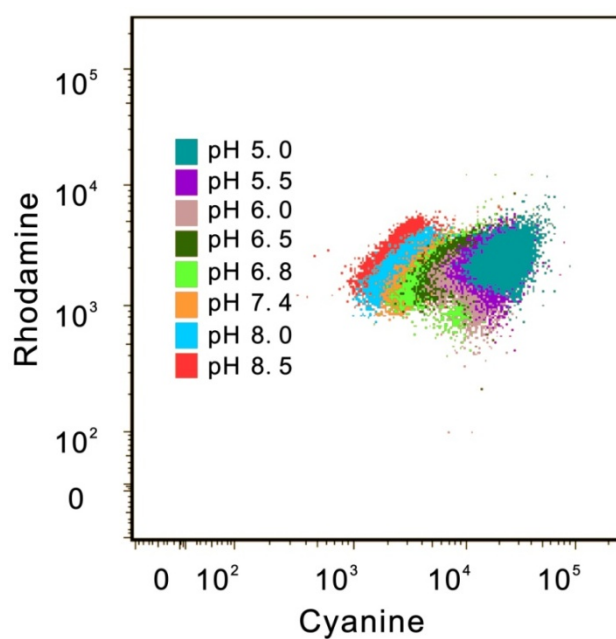

**Figure S6.** Flow cytometry analysis of pH response of RhoSSCy to MCF-7 cells.

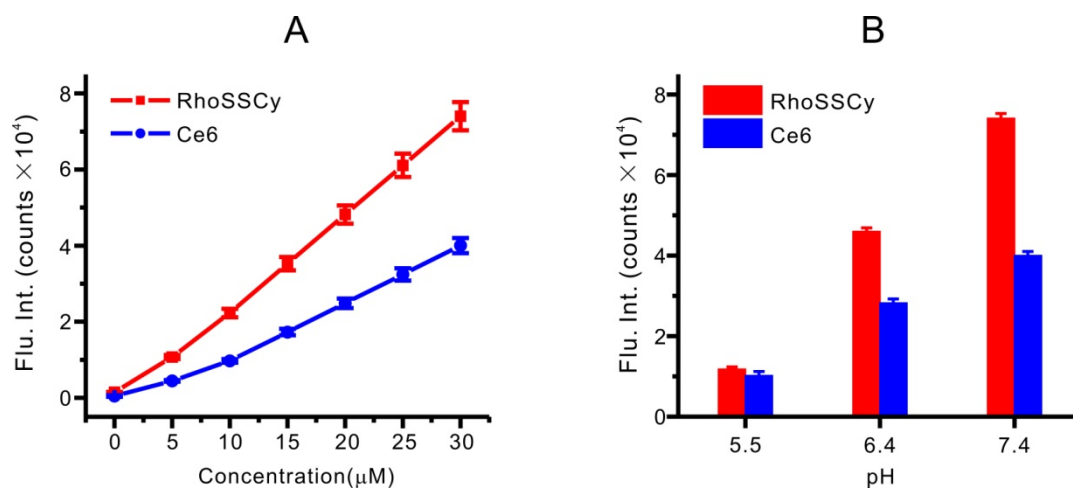

**Figure S7.** ROS levels monitored through fluorescence intensity of DCF produced by RhoSSCy and Ce6. (A) The correlation between ROS levels and concentrations of RhoSSCy and Ce6. (B) The correlation between ROS levels and pH of RhoSSCy and Ce6 solution.

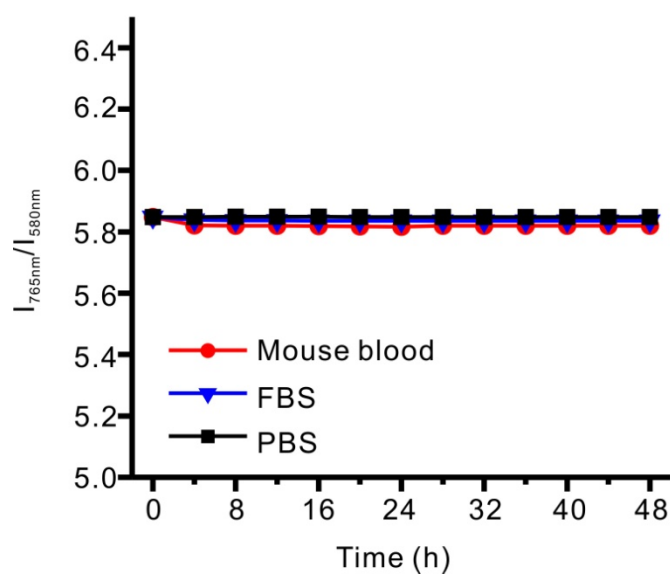

**Figure S8.** The ratio of fluorescent intensity at 765/580 nm in mouse blood, FBS and PBS within 48h.

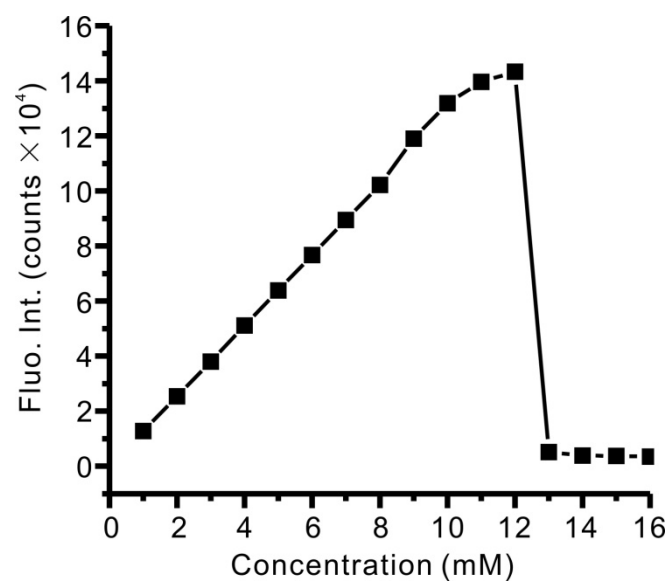

**Figure S9.** Fluorescent intensity of RhoSSCy at different concentrations. ( $\lambda_{\text{ex}}$  at 640 nm,  $\lambda_{\text{em}}$  at 765 nm, slit width 0.1nm)
